# Supplementary material for: Valorization of Cork Using Subcritical Water
Source: Molecules. 2020 Oct 14;25(20):4695. doi: 10.3390/molecules25204695 (PMC7587334; doi:10.3390/molecules25204695)
Supplement: Supplementary file 1 [file molecules-25-04695-s001.pdf]

## Supplementary Materials

### Valorization of cork using subcritical water

Mónica Cunha \*, Ana Lourenço, Susana Barreiros, Alexandre Paiva and Pedro Simões \*

LAQV-REQUIMTE, Chemistry Department, Faculdade de Ciências e Tecnologia, Universidade Nova de Lisboa, 2829-516, Caparica, Portugal

#### List of Contents in Supplementary Materials

**Figure S1.** HPLC chromatogram of phenolics of SBW extract 1 (T < 50) obtained in the assay targeting 200 °C

**Figure S2.** HPLC chromatogram of phenolics of SBW extract 2 (T: 50 - 120) obtained in the assay targeting 200 °C

**Figure S3.** HPLC chromatogram of phenolics of SBW extract 3 (T: 120 - 200) obtained in the assay targeting 200 °C

**Figure S4.** HPLC chromatogram of phenolics of SBW extract 4 (T: 200) obtained in the assay targeting 200 °C

**Figure S5.** HPLC chromatogram of monosaccharides of the granulated cork

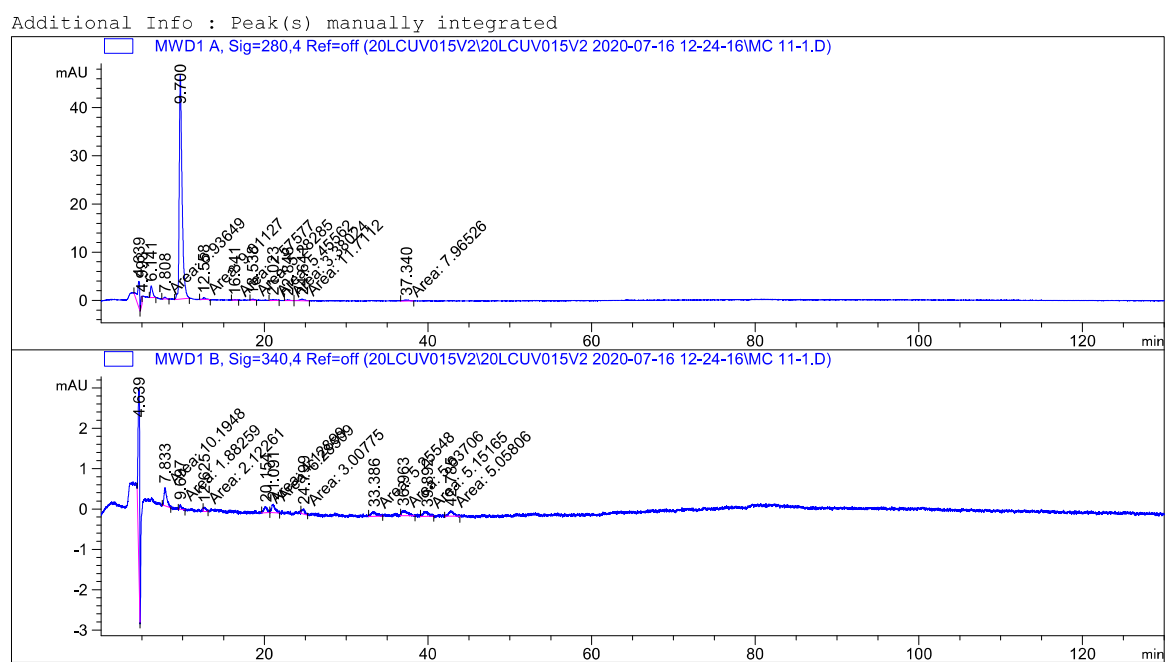

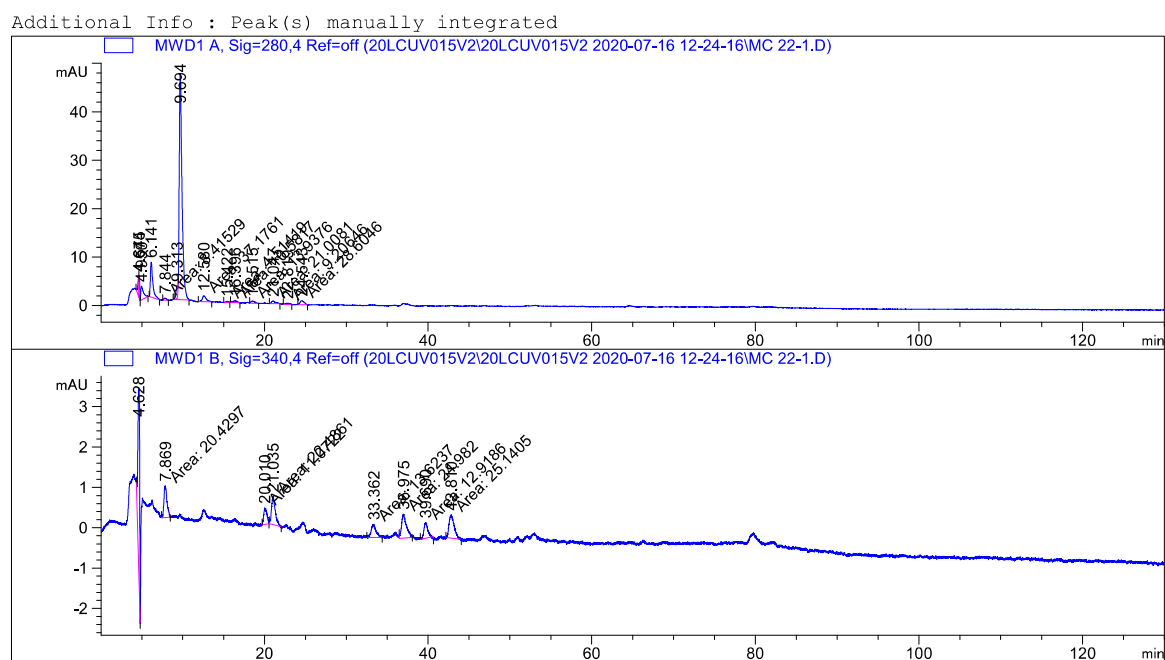

**Figure S2.** HPLC chromatogram of phenolics of SBW extract 2 (T: 50 - 120) obtained in the assay targeting 200 °C

Additional Info : Peak(s) manually integrated

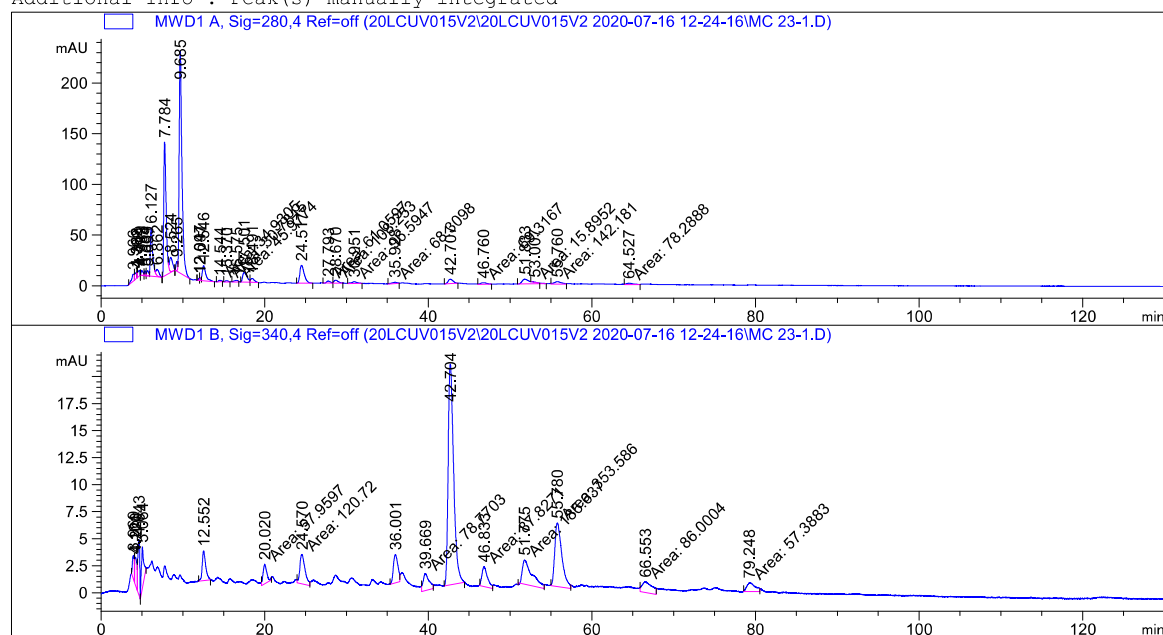

**Figure S3.** HPLC chromatogram of phenolics of SBW extract 3 (T: 120 - 200) obtained in the assay targeting 200 °C

Additional Info : Peak(s) manually integrated

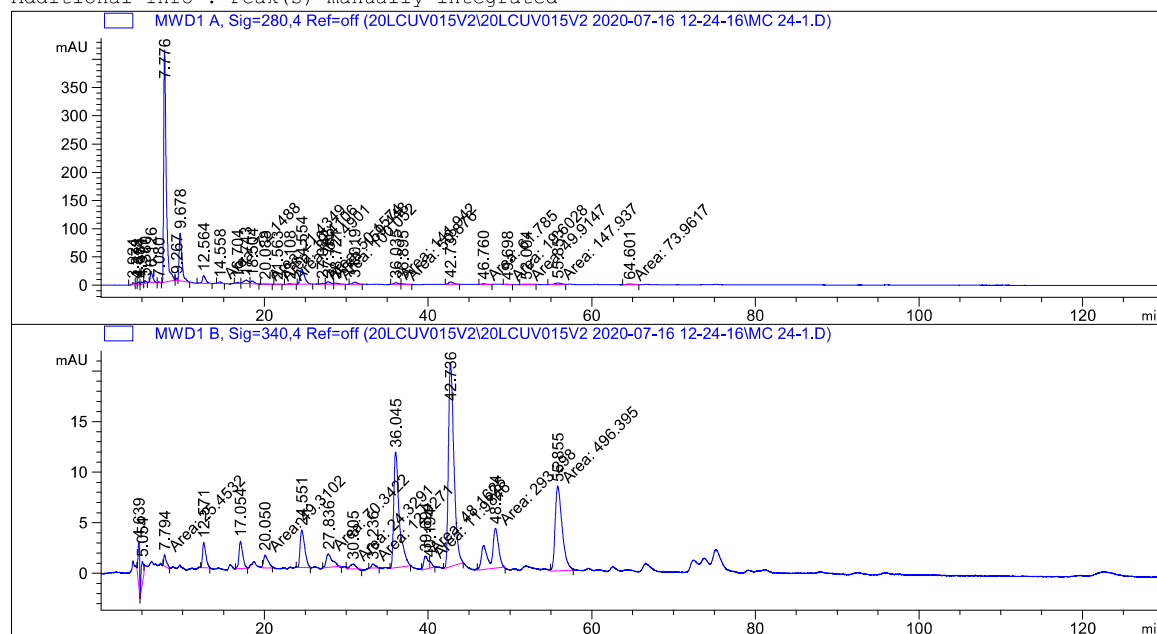

**Figure S4.** HPLC chromatogram of phenolics of SBW extract 4 (T: 200) obtained in the assay targeting 200 °C

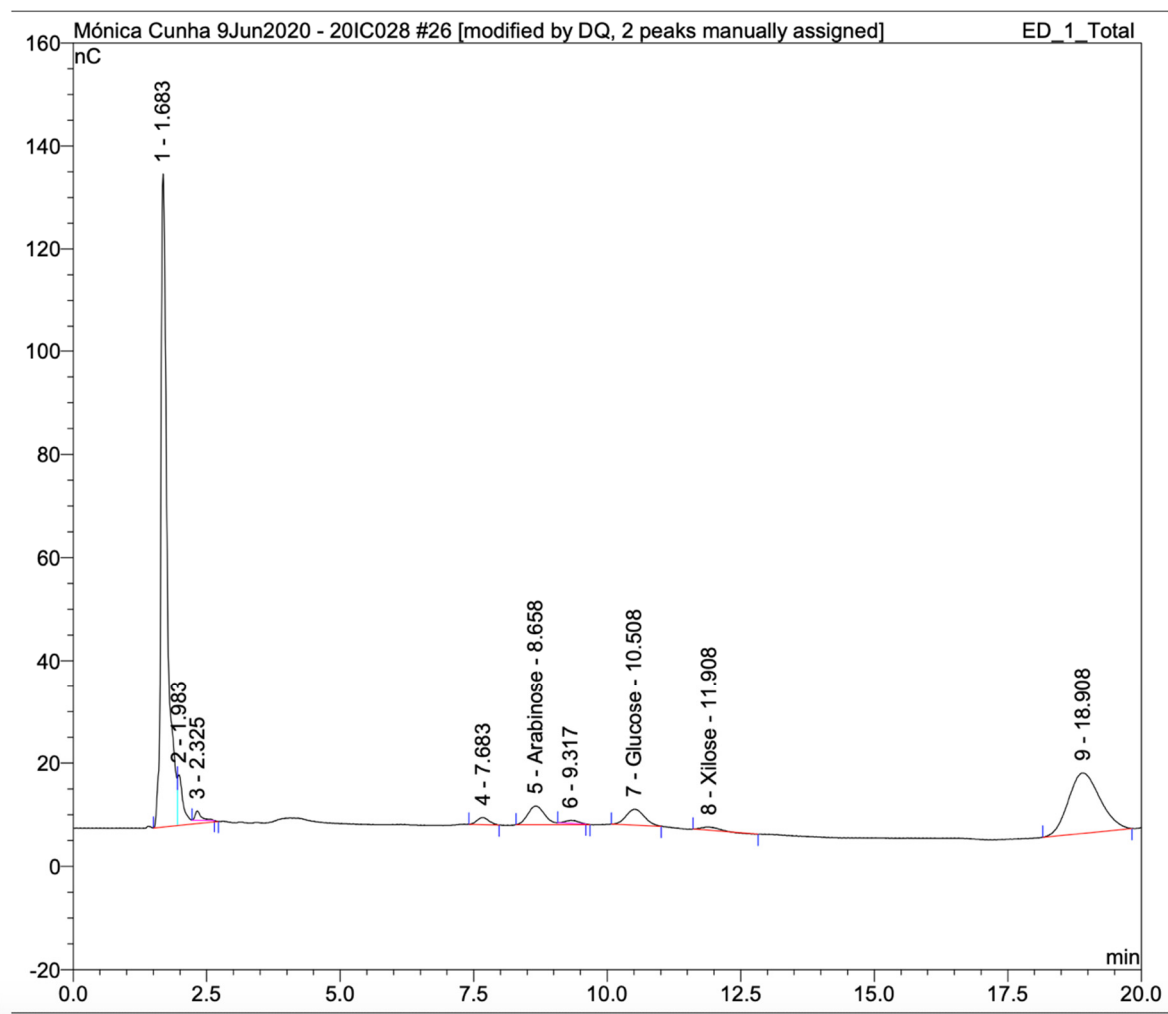

**Figure S5.** HPLC chromatogram of monosaccharides of the granulated cork
